# Supplementary material for: A novel, mesoporous molybdenum doped titanium dioxide/reduced graphene oxide composite as a green, highly efficient solid acid catalyst for acetalization
Source: Royal Society of Chemistry journal article supplement (doi:10.1039/c9dt03633d), 2019-12-02
Supplement: c9dt03633d1.pdf [file c9dt03633d1.pdf]

## Supplementary Information

A Novel, Mesoporous Molybdenum Doped Titanium Dioxide/ Reduced Graphene Oxide Composite as a Green, Highly Efficient Solid Acid Catalyst for Acetalization

Wimalika R. K. Thalaspitiya, Tharindu M. P. K. Kapuge, Junkai He, Peter Kerns, Andrew Meguerdichian, and Steven L. Suib\*

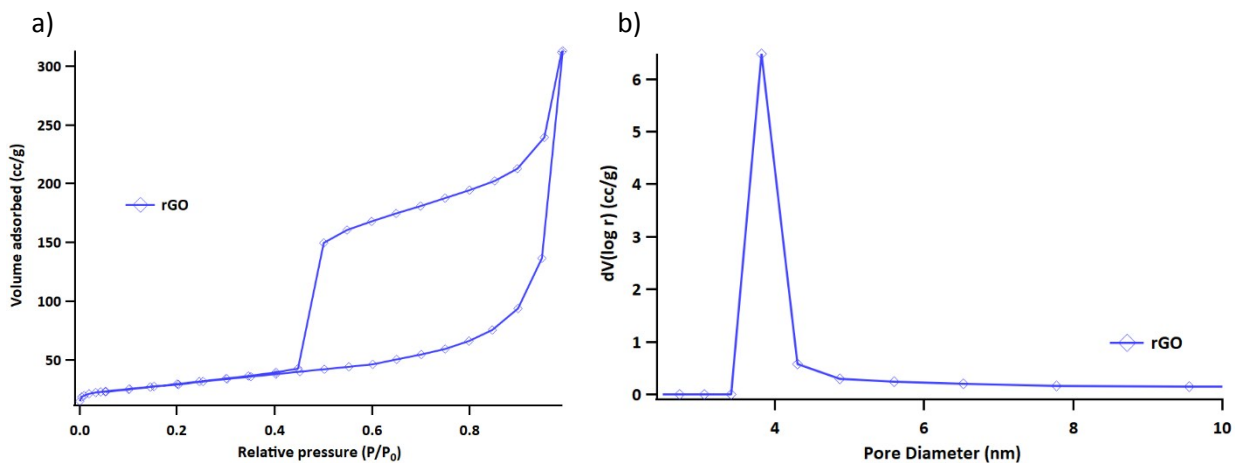

Figure 1. a) BET isotherm b) BJH pore size distribution curve of reduced graphene oxide (rGO).

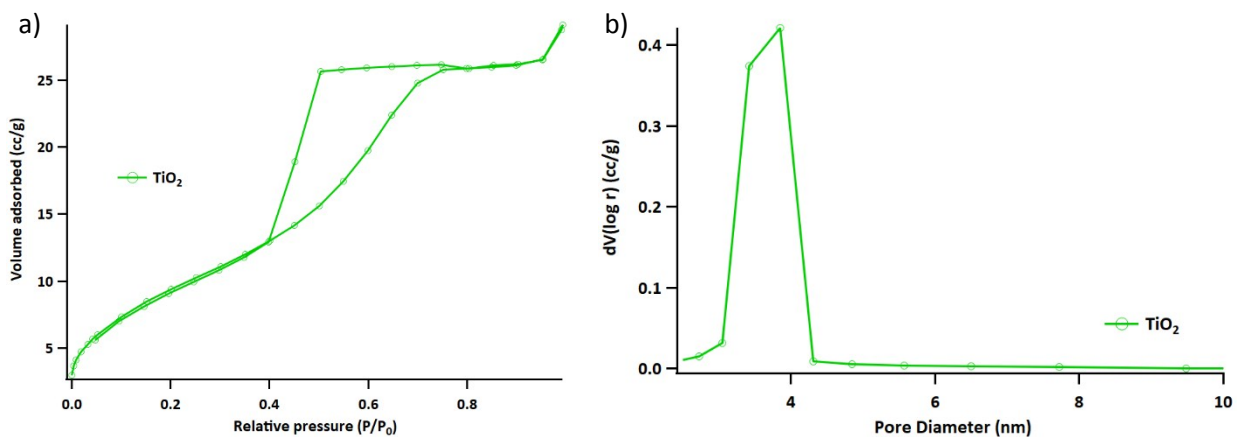

Figure 2. a) BET isotherm b) BJH pore size distribution curve of  $\text{TiO}_2$ .

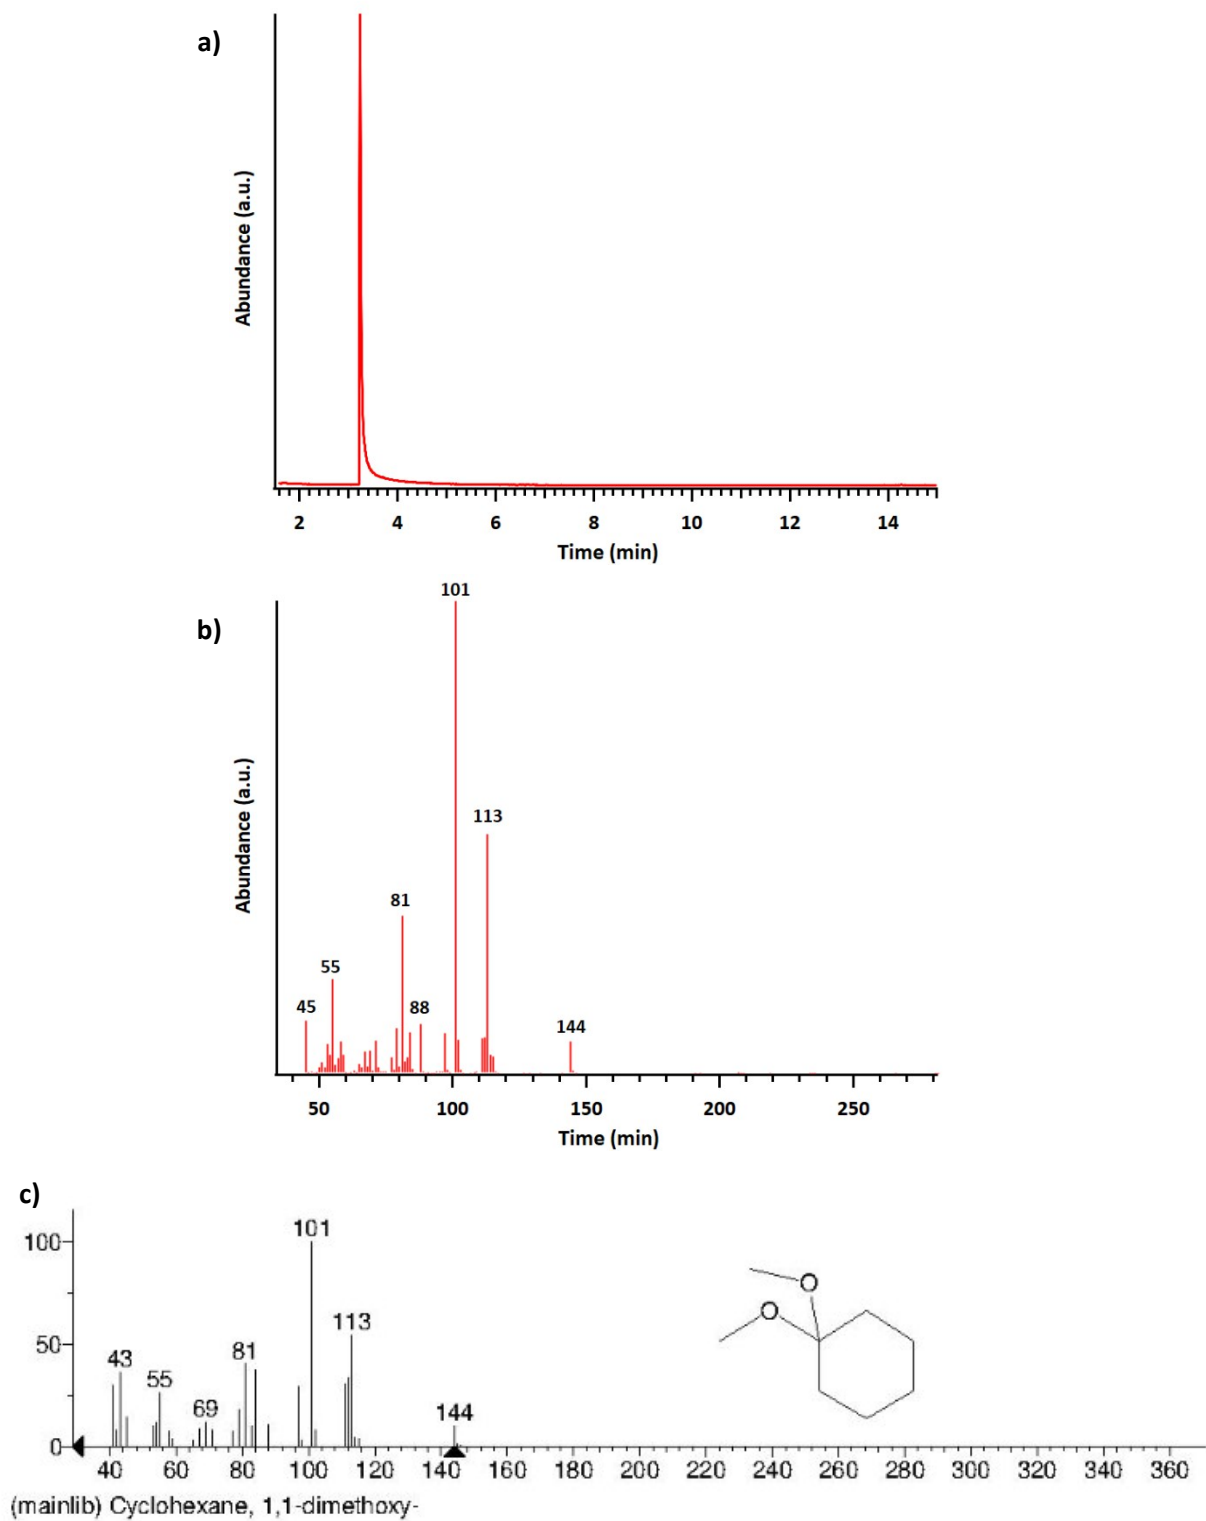

Figure 3. a) Gas Chromatogram b) mass spectrum of the product c) library mass spectrum of 1,1-dimethoxy cyclohexane.

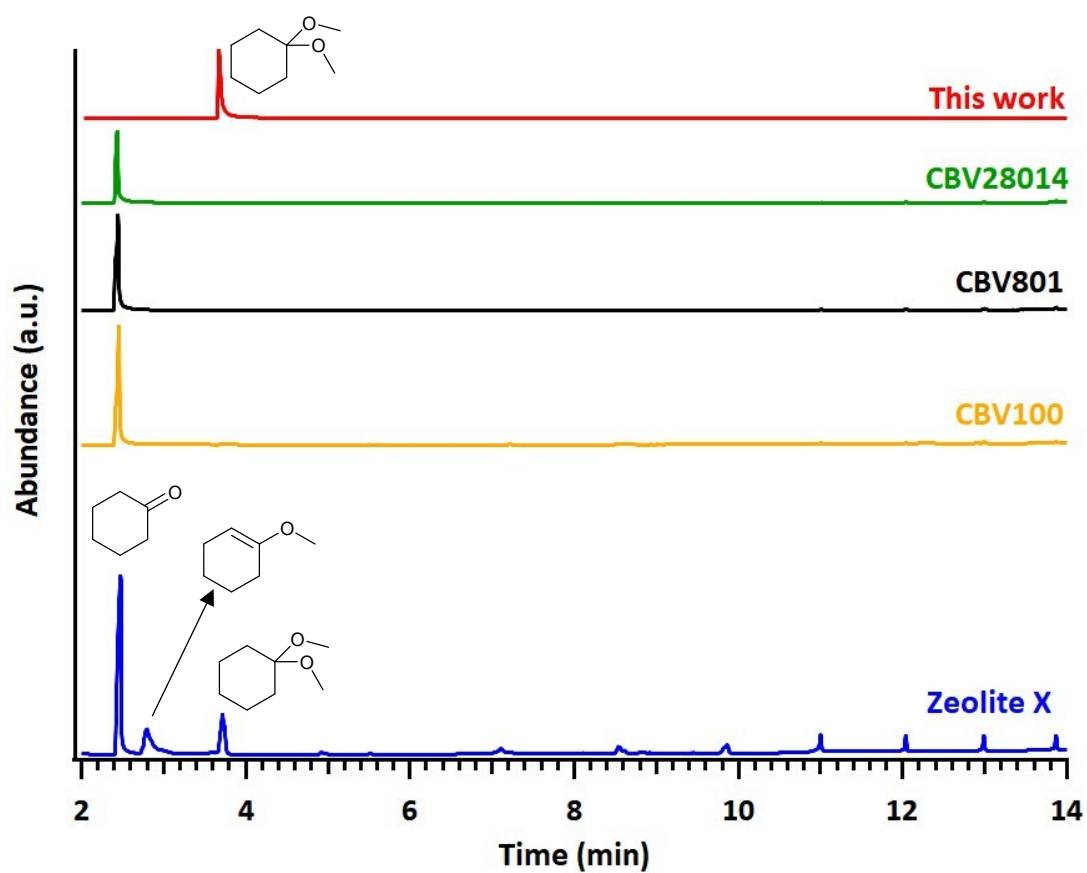

Figure 4. GC data obtained for the reactions conducted with different heterogeneous acid catalysts.

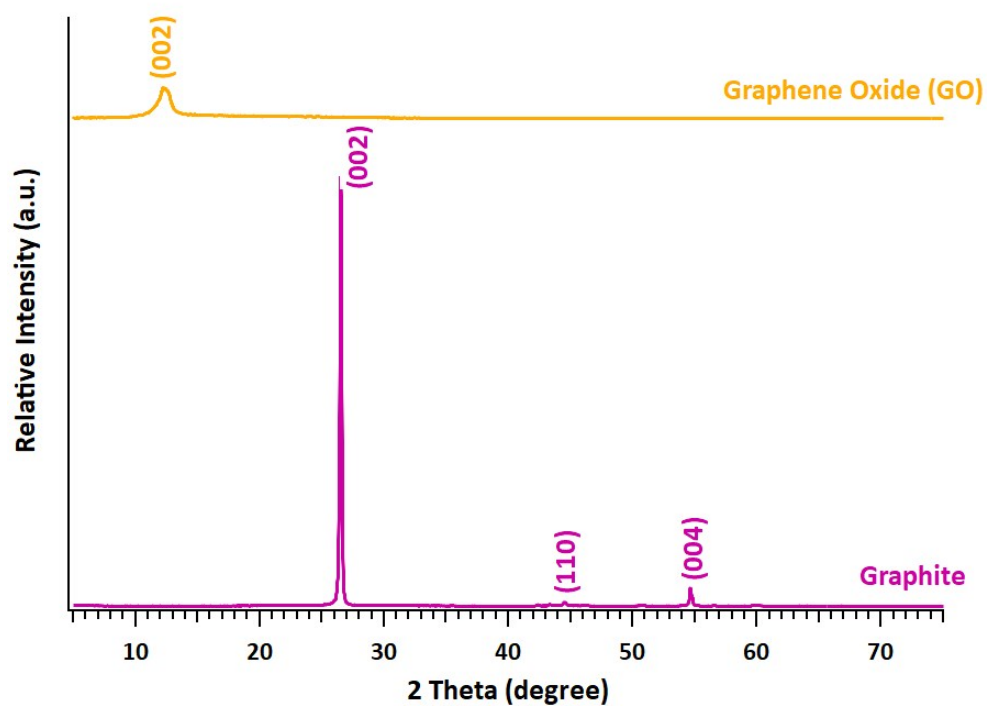

Figure 5. PXRD patterns of graphite and graphene oxide (GO).

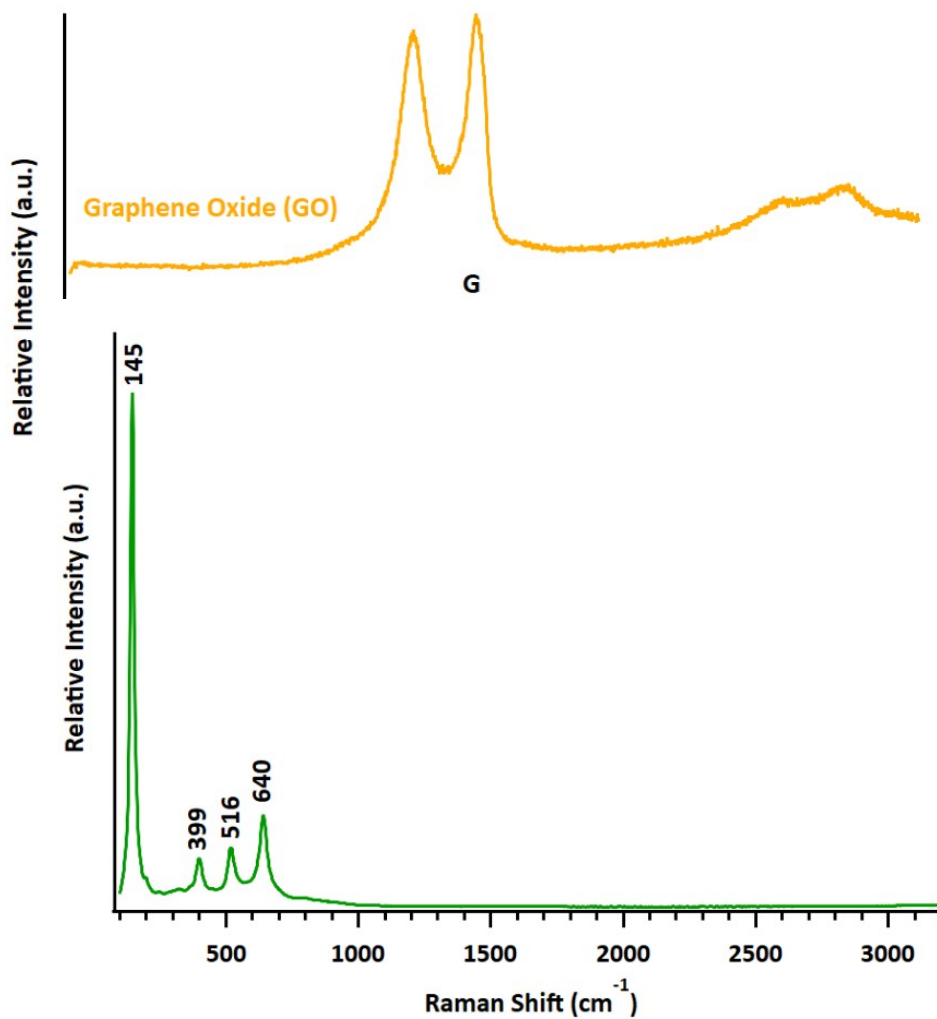

Figure 7. Raman spectrum of  $\text{TiO}_2$ .

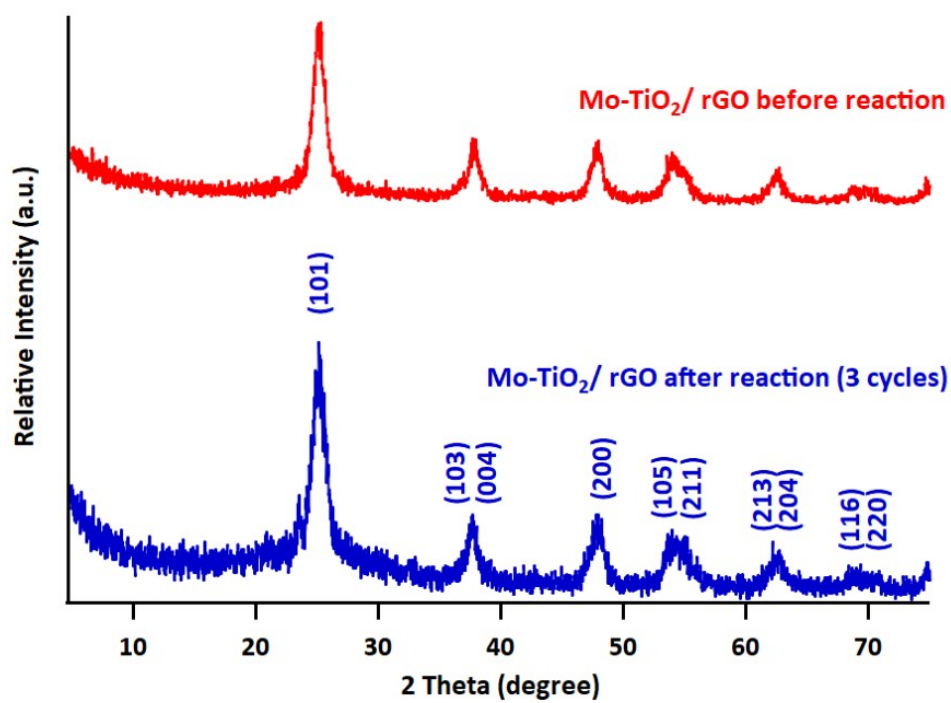

Figure 8. PXRD patterns of the catalyst before and after the acetalization reaction.

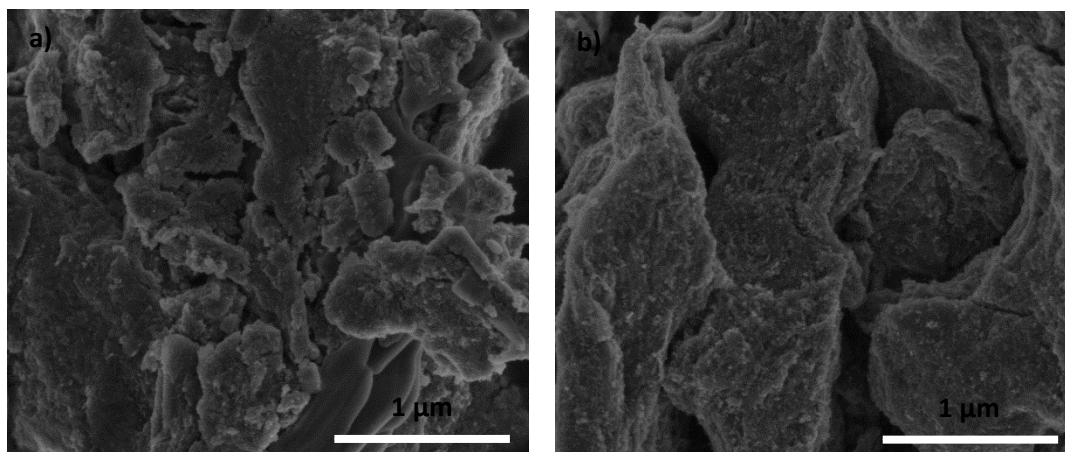

Figure 9. SEM images of the catalyst a) before and b) after the acetalization reaction.

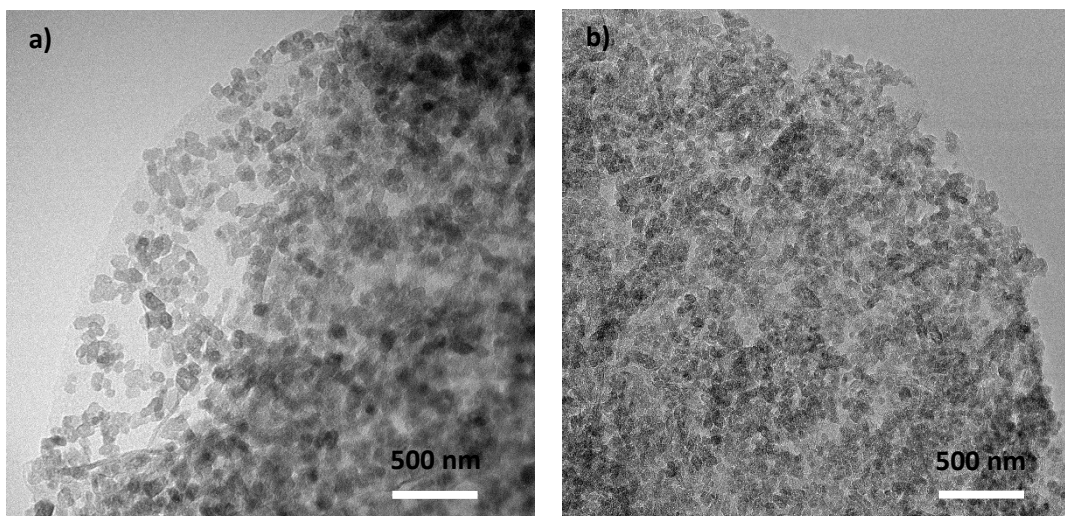

Figure 10. HR-TEM images of the catalyst a) before and b) after the acetalization reaction.

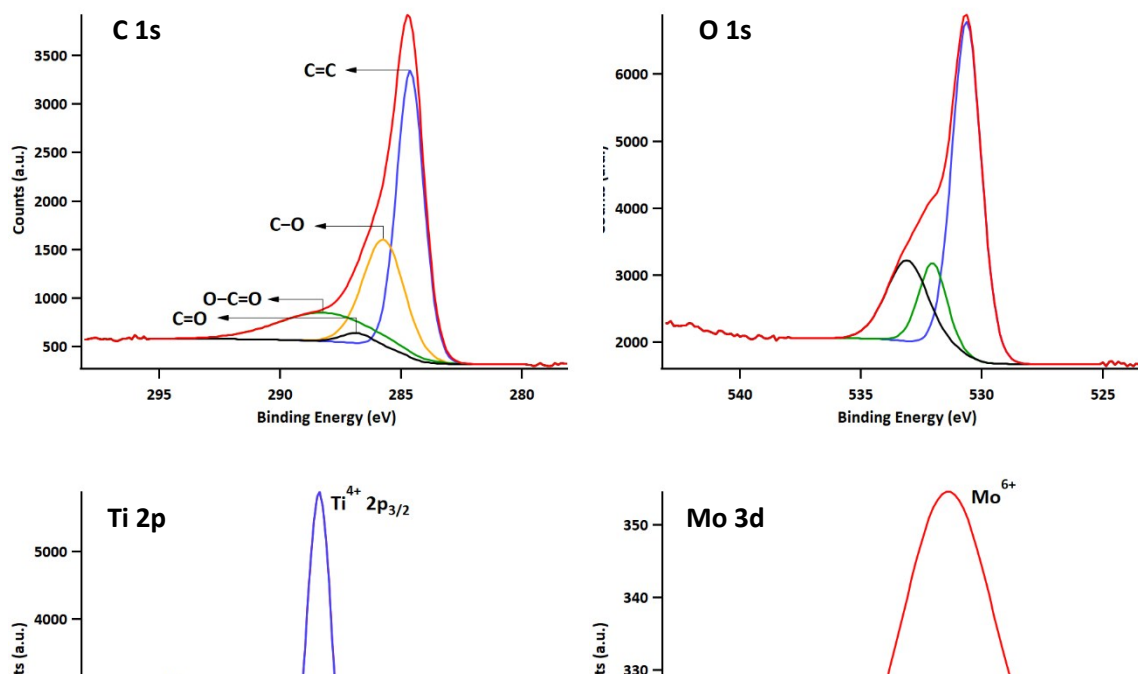

Figure 11. XP spectra of the catalyst after the acetalization reaction.

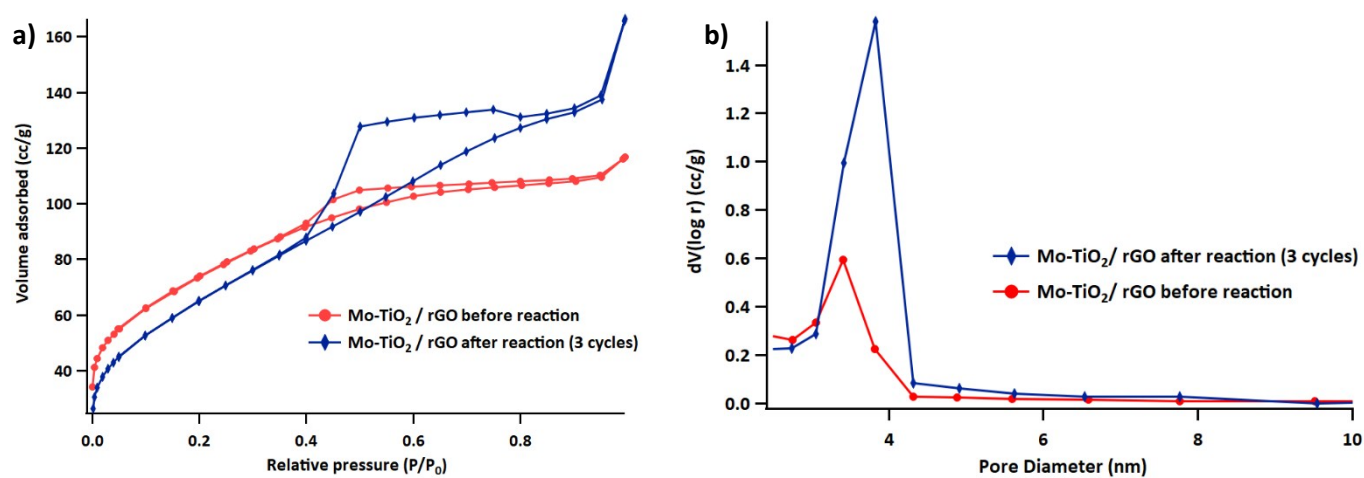

Figure 12. a) BET isotherms b) BJH pore size distribution curves of the catalyst before and after the acetalization reaction.

Table 1. The catalytic reactions performed using commercial acid catalysts.

| Commercial acid catalyst | GC Yield (%) | TOF <sup>a</sup> (h <sup>-1</sup> ) |
|--------------------------|--------------|-------------------------------------|
| Zeolite X                | 8%           | 0.1                                 |
| CBV100                   | <1           | ND <sup>b</sup>                     |
| CBV801                   | <1           | ND <sup>b</sup>                     |
| CBV28014                 | <1           | ND <sup>b</sup>                     |
